# Supplementary material for: Exercise training prevents the perivascular adipose tissue-induced aortic dysfunction with metabolic syndrome
Source: PubMed Central journal article supplement — Redox Biol. 2019 Jul 26;26:101285. doi: 10.1016/j.redox.2019.101285 (PMC6669320; doi:10.1016/j.redox.2019.101285), 2019-07-26
Supplement: mmc3.pdf [file mmc3.pdf]

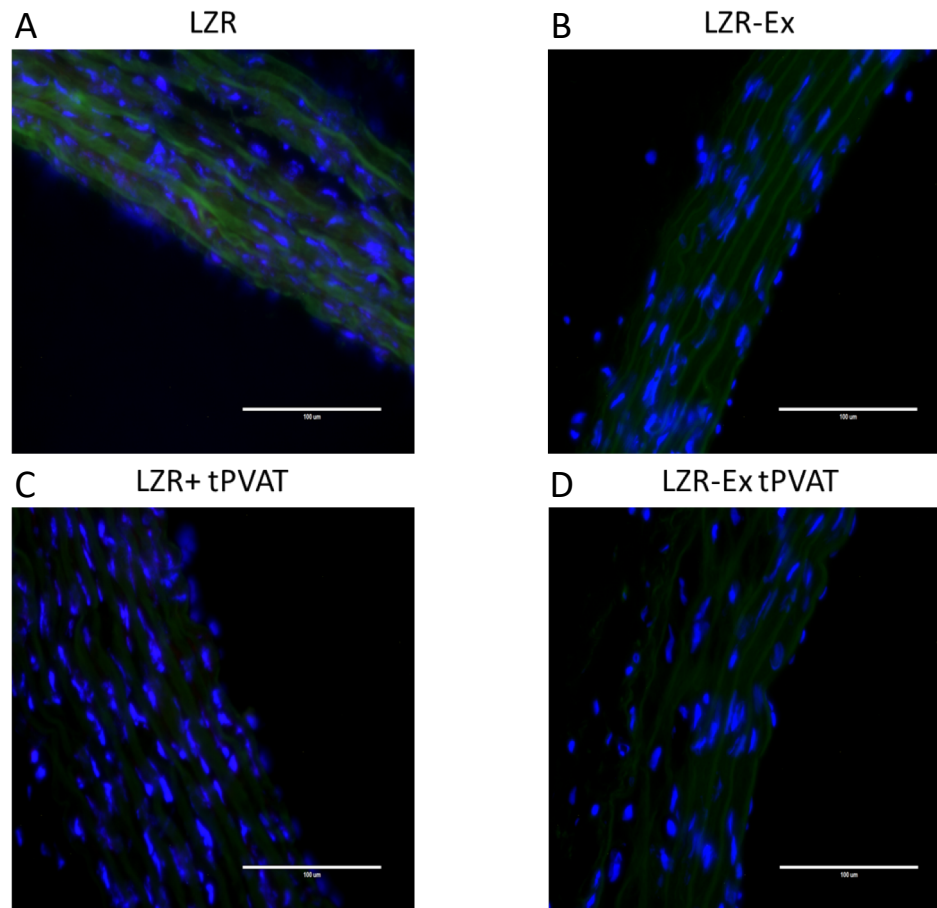

Figure S2. Representative images of the oxidative load in the thoracic aorta in the presence absence of thoracic perivascular adipose tissue in lean rats. Panels A and B, reflect the lean (LZR) thoracic aorta from control and exercise trained (Ex) rats. Panels C and D, demonstrate the effects of tPVAT on mediating the oxidative load in the aorta from control and Ex LZR (n=5-8).
